# Supplementary material for: The PAX1 locus at 20p11 is a potential genetic modifier for bilateral cleft lip
Source: PubMed Central journal article supplement — HGG Adv. 2021 Jan 30;2(2):100025. doi: 10.1016/j.xhgg.2021.100025 (PMC8018676; doi:10.1016/j.xhgg.2021.100025), 2021-01-30
Supplement: NIHMS1680562-supplement-Supplementary_Figures.pdf [file NIHMS1680562-supplement-Supplementary_Figures.pdf]

## **Supplementary Figures and Tables**

Table S1: Participant demographics

Table S2: Associated loci in bilateral cleft lip

Table S3: Associated loci in unilateral cleft lip

Table S4: Associated loci in bilateral cleft lip and palate

Table S5: Associated loci in unilateral cleft lip and palate

Table S6: Comparison of subtype-specific analyses

Table S7: Loci with suggestive significance in the modifier analysis in cleft lip

Table S8: Loci with suggestive significance in the modifier analysis in cleft lip and palate

Table S9: Loci with suggestive significance in the modifier analysis of cleft lip with or without cleft palate

Table S10: Replication results for 20p11 in cleft lip

Table S11: Replication results for 20p11 in cleft lip and palate

Table S12: Comparison of known loci with modifier analyses

Table S13: Functional enrichment for all analyses across development

Figure S1: PC plot for the POFC cohort

Figure S2: PC plot for the GENEVA cohort

Figure S3: Q-Q plots of the  $-\log_{10}(\text{p-values})$  of SNPs in the bilateral CL (A), unilateral CL (B), bilateral CLP (C), and unilateral CLP (D) subtype-specific case-control analysis.

Figure S4: Manhattan plots of  $-\log_{10}(\text{p-values})$  from the case-control analyses of bilateral cleft lip (A), unilateral cleft lip (B), bilateral cleft lip and palate (C), and unilateral cleft lip and palate (D).

Figure S5: Regional association plots showing  $-\log_{10}(\text{p-values})$  for the novel genome-wide suggestive peaks at 14q32 in the modifier analysis in bilateral CL (A), unilateral CL (B), bilateral CLP (C), and unilateral CLP (D).

Figure S6: Regional association plots showing  $-\log_{10}(\text{p-values})$  for the novel genome-wide suggestive peaks at 2q13 in the modifier analysis in bilateral CL (A), unilateral CL (B), bilateral CLP (C), and unilateral CLP (D).

Figure S7: The log odds ratio for SNPs that were suggestive ( $p < 1 \times 10^{-5}$ ) or significant ( $p < 5 \times 10^{-8}$ ) in the subtype-specific case-control analyses in were compared between BCL and BCLP (A), UCL and UCLP (B)

Figure S8: Q-Q plots of the  $-\log_{10}(\text{p-values})$  of SNPs in the CL (A) and CLP (B) modifier analysis.

Figure S9: Genome-wide results for the bilateral vs unilateral modifier analysis with CL and CLP combined.

Figure S10: Topologically-associated domain (TAD) surrounding the 20p11 locus that was significantly associated with bilateral CL.

Figure S11: Enrichment of the top SNPs associated in either the CL modifier analysis, CLP modifier analysis, and each subtype analysis ( $p < 1 \times 10^{-3}$ ) were tested in each genomic region defined during craniofacial development.

**Table S1: Participant demographics based on genetically defined ancestry groups**

|                                           | Cleft lip only |             | Cleft lip and palate |             | Controls    |
|-------------------------------------------|----------------|-------------|----------------------|-------------|-------------|
|                                           | Bilateral      | Unilateral  | Bilateral            | Unilateral  |             |
| Number of participants                    | 44 (8.1%)      | 502         | 572 (31.9%)          | 1221        | 1626        |
| Number of families                        | 44             | 434         | 530                  | 1123        | 1626        |
| Number with Asian ancestry                | 15 (34.1%)     | 184 (36.7%) | 121 (21.4%)          | 205 (16.9%) | 161 (9.9%)  |
| Number with European ancestry             | 13 (29.5%)     | 151 (30.1%) | 159 (28.1%)          | 315 (26.0%) | 835 (51.4%) |
| Number with Latin/South American ancestry | 15 (34.1%)     | 167 (33.3%) | 285 (50.4%)          | 692 (57.0%) | 626 (38.5%) |
| Number with Unspecified ancestry          | 1 (2.3%)       | 0 (0%)      | 1 (0.2%)             | 1 (0.1%)    | 4 (0.2%)    |

**Table S6: Comparison of subtype-specific analyses**

| <b>Comparison</b> | <b>Percent of SNPs with same effect size that are known</b> | <b>Percent of SNPs with different effect sizes that are known</b> | <b>Odds ratio</b> | <b>95% CI</b> | <b>P-value</b>         |
|-------------------|-------------------------------------------------------------|-------------------------------------------------------------------|-------------------|---------------|------------------------|
| BCL-UCL           | 1.8%                                                        | 26.8%                                                             | 0.05              | 0.02-0.11     | $2.41 \times 10^{-20}$ |
| BCLP-UCLP         | 8.6%                                                        | 44.0%                                                             | 0.12              | 0.04-0.28     | $1.04 \times 10^{-7}$  |
| BCL-BCLP          | 7.7%                                                        | 31.4%                                                             | 0.18              | 0.12-0.26     | $6.89 \times 10^{-20}$ |
| UCL-UCLP          | 43.7%                                                       | 54.3%                                                             | 0.65              | 0.47-0.88     | 0.005                  |

**Table S9: Loci with suggestive significance in the modifier analysis of cleft lip with or without cleft palate**

| <b>Locus</b> | <b>Top variant</b> | <b>Reference allele</b> | <b>Alternate allele</b> | <b>AF<sup>1</sup></b> | <b>OR<sup>2</sup></b> | <b>95%CI</b> | <b>P</b> |
|--------------|--------------------|-------------------------|-------------------------|-----------------------|-----------------------|--------------|----------|
| 20p11.23     | rs12480480         | G                       | A                       | 0.17                  | 1.49                  | 1.37-1.62    | 1.72E-06 |
| 4p15.33      | rs11373830         | C                       | CA                      | 0.07                  | 1.99                  | 1.73-2.3     | 2.47E-06 |
| 4p16.1       | rs149050104        | C                       | T                       | 0.06                  | 1.82                  | 1.61-2.05    | 3.94E-06 |

<sup>1</sup>Allele frequency of alternate allele

<sup>2</sup>Risk of BCL over UCL

**Table S10: Replication results for 20p11 in cleft lip**

| <b>SNP</b>  | <b>CHR</b> | <b>BP</b> | <b>Reference allele</b> | <b>Alternate allele</b> | <b>AF<sup>1</sup></b> | <b>OR<sup>2</sup></b> | <b>95% CI</b> | <b>P-value</b> |
|-------------|------------|-----------|-------------------------|-------------------------|-----------------------|-----------------------|---------------|----------------|
| rs6113495   | 20         | 22061487  | G                       | A                       | 0.46                  | 1.05                  | 0.57-1.92     | 0.8735         |
| rs6113496   | 20         | 22061632  | T                       | G                       | 0.40                  | 0.74                  | 0.40-1.35     | 0.33           |
| rs6047869   | 20         | 22062683  | A                       | C                       | 0.40                  | 0.74                  | 0.40-1.35     | 0.33           |
| 20:22062945 | 20         | 22062945  | G                       | A                       | 0.15                  | 1.14                  | 0.34-3.81     | 0.8314         |
| rs115747027 | 20         | 22063265  | T                       | C                       | 0.40                  | 0.74                  | 0.40-1.35     | 0.33           |
| 20:22063347 | 20         | 22063347  | T                       | C                       | 0.13                  | 3.83                  | 1.64-8.95     | 0.001897       |
| rs113999308 | 20         | 22063421  | C                       | T                       | 0.28                  | 1.17                  | 0.40-3.43     | 0.763          |
| rs117160568 | 20         | 22063660  | A                       | G                       | 0.46                  | 1.05                  | 0.57-1.93     | 0.8575         |

<sup>1</sup>Allele frequency of alternate allele

<sup>2</sup>Risk of BCL over UCL

**Table S11: Replication results for 20p11 in cleft lip and palate**

| <b>SNP</b>  | <b>CHR</b> | <b>BP</b> | <b>Reference allele</b> | <b>Alternate allele</b> | <b>AF<sup>1</sup></b> | <b>OR<sup>2</sup></b> | <b>95% CI</b> | <b>P-value</b> |
|-------------|------------|-----------|-------------------------|-------------------------|-----------------------|-----------------------|---------------|----------------|
| rs6113495   | 20         | 22061487  | G                       | A                       | 0.44                  | 1.03                  | 0.84-1.26     | 0.7304         |
| rs6113496   | 20         | 22061632  | T                       | G                       | 0.39                  | 0.90                  | 0.73-1.11     | 0.3611         |
| rs6047869   | 20         | 22062683  | A                       | C                       | 0.39                  | 0.91                  | 0.74-1.12     | 0.3846         |
| 20:22062934 | 20         | 22062934  | T                       | G                       | 0.05                  | 0.94                  | 0.55-1.60     | 0.8225         |
| 20:22062945 | 20         | 22062945  | G                       | A                       | 0.16                  | 1.34                  | 0.92-1.94     | 0.1232         |
| rs115747027 | 20         | 22063265  | T                       | C                       | 0.39                  | 0.90                  | 0.73-1.11     | 0.3611         |
| 20:22063347 | 20         | 22063347  | T                       | C                       | 0.18                  | 1.12                  | 0.80-1.57     | 0.476          |
| rs113999308 | 20         | 22063421  | C                       | T                       | 0.28                  | 1.30                  | 0.96-1.75     | 0.08084        |
| rs117160568 | 20         | 22063660  | A                       | G                       | 0.44                  | 1.03                  | 0.84-1.26     | 0.7304         |

<sup>1</sup>Allele frequency of alternate allele

<sup>2</sup>Risk of BCLP over UCLP

**Table S12: Comparison of known loci with modifier analyses**

| <b>Comparison</b> | <b>Known SNPs</b>          | <b>Odds ratio</b> | <b>95% CI</b> | <b>P-value</b> |
|-------------------|----------------------------|-------------------|---------------|----------------|
| BCL v UCL         | rs200656853;<br>rs35640367 | 0.26              | 0.04-0.84     | 0.03           |
| BCLP v UCLP       | rs71776173;<br>rs134124    | 0.53              | 0.08-1.71     | 0.32           |

Supplementary figures

Figure S1: PC plot for the POFC cohort

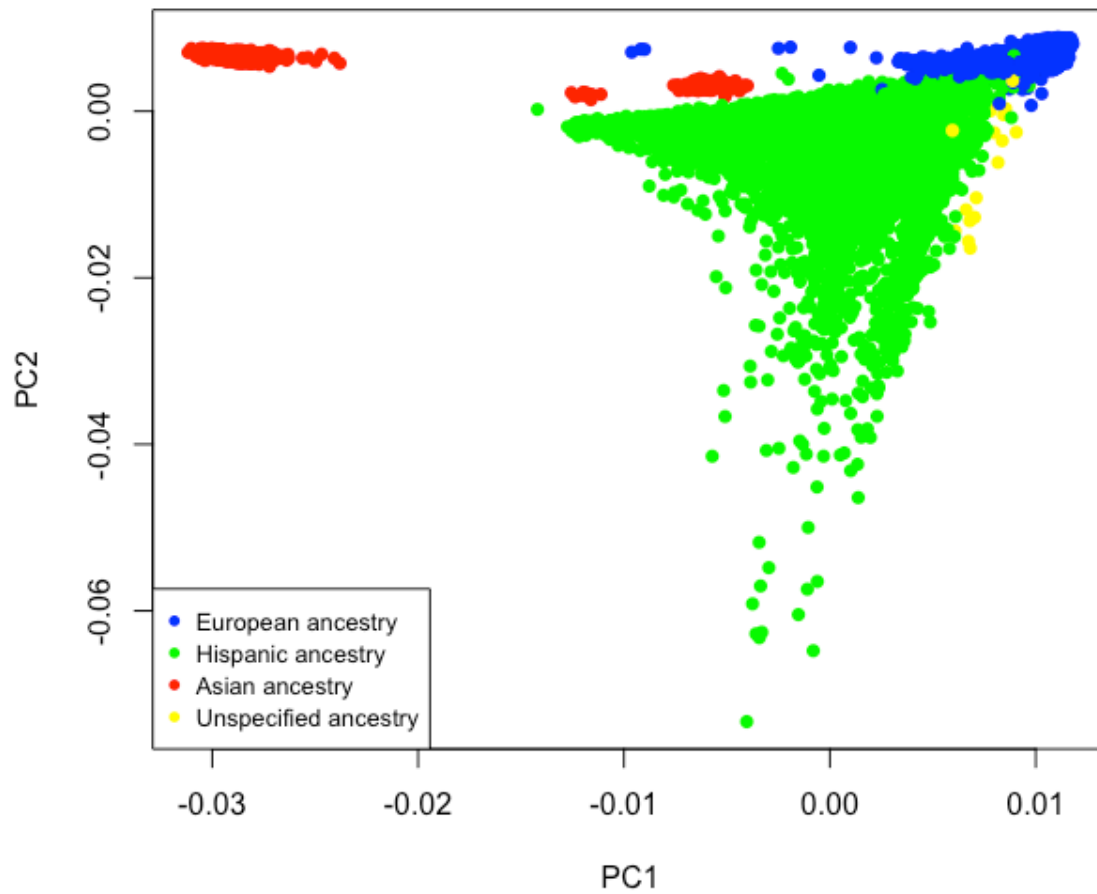

The first two principal components (PCs) for the POFC dataset used in this analysis, showing that a majority of the cohort is of European, Asian, or Hispanic ancestry.



Figure S2: PC plot for the GENEVA cohort

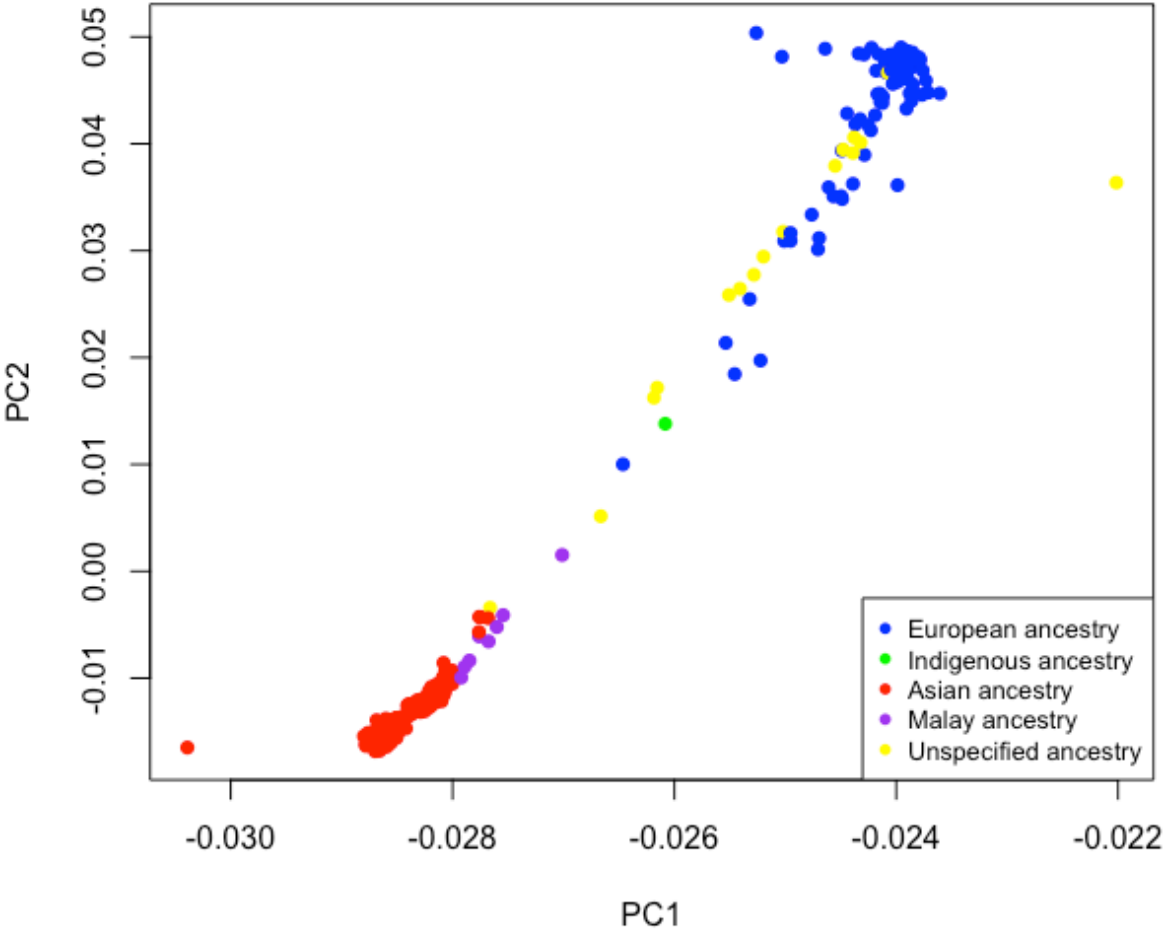

The first two principal components (PCs) for the GENEVA dataset used for replication in this analysis, showing that a majority of the cohort is of European and Asian ancestry.

Figure S3: QQ plots for the subtype-specific analyses

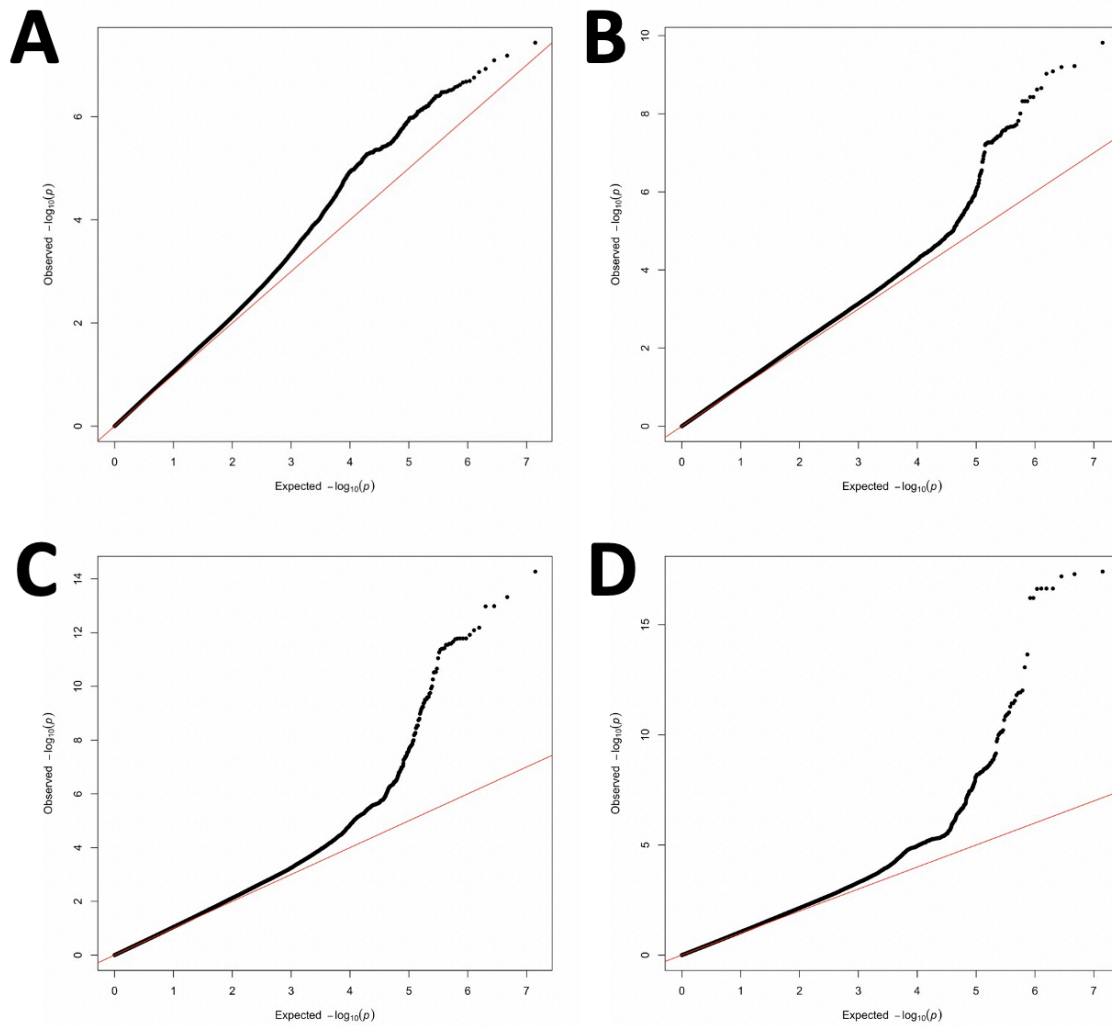

Q-Q plots of the  $-\log_{10}(p)$ -values of SNPs in the bilateral CL (A), unilateral CL (B), bilateral CLP (C), and unilateral CLP (D) subtype-specific case-control analysis. The genomic inflation factors are 1.10, 1.07, 1.05, and 1.06, respectively.

Figure S4: Manhattan plots for the subtype-specific analyses.

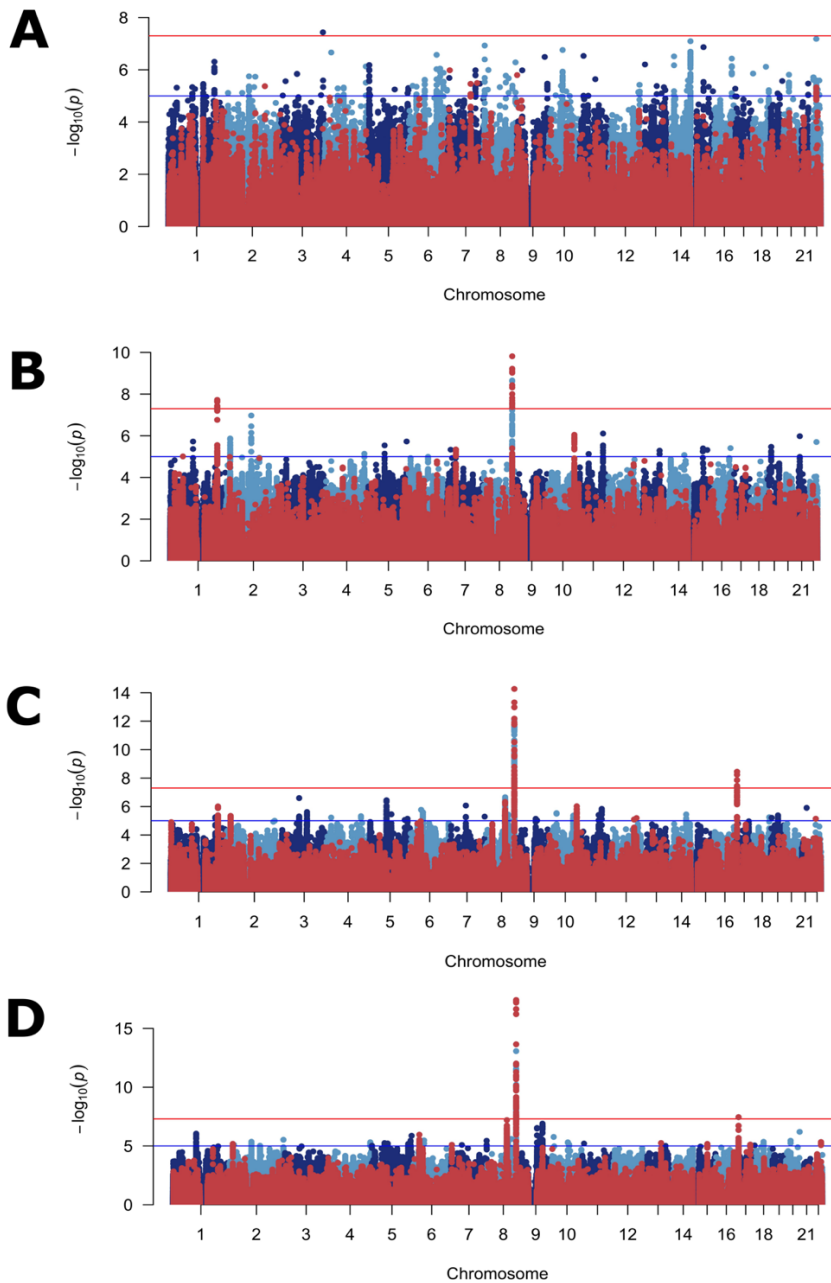

Manhattan plots of  $-\log_{10}(p)$ -values from the case-control analyses of bilateral cleft lip (A), unilateral cleft lip (B), bilateral cleft lip and palate (C), and unilateral cleft lip and palate (D). Lines indicate suggestive (blue) and genome-wide (red) thresholds for statistical significance. The points in red indicate SNPs within 50kb of a locus previously implicated in nonsyndromic clefting. The genomic inflation factors are 1.10, 1.07, 1.05, and 1.06 respectively.

**Figure S5:** Regional association plots showing  $-\log_{10}(\text{p-values})$  for the novel genome-wide suggestive peaks at 14q32 in the modifier analysis in bilateral CL (A), unilateral CL (B), bilateral CLP (C), and unilateral CLP (D). Plots were generated using LocusZoom. The recombination overlay (blue line, right y-axis) indicates the boundaries of the LD block. Points are color coded according to pairwise LD ( $r^2$ ) with the index SNP.

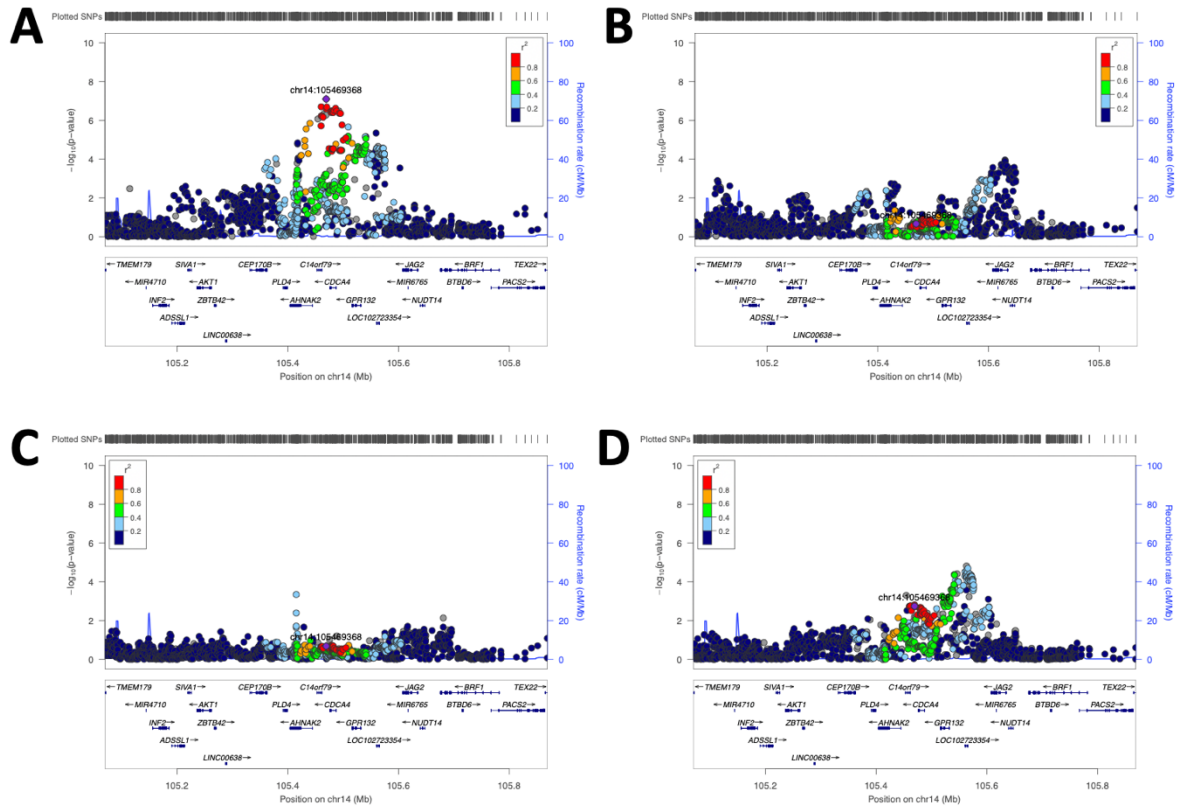

Figure S6: Regional association plots for subtype-specific analyses.

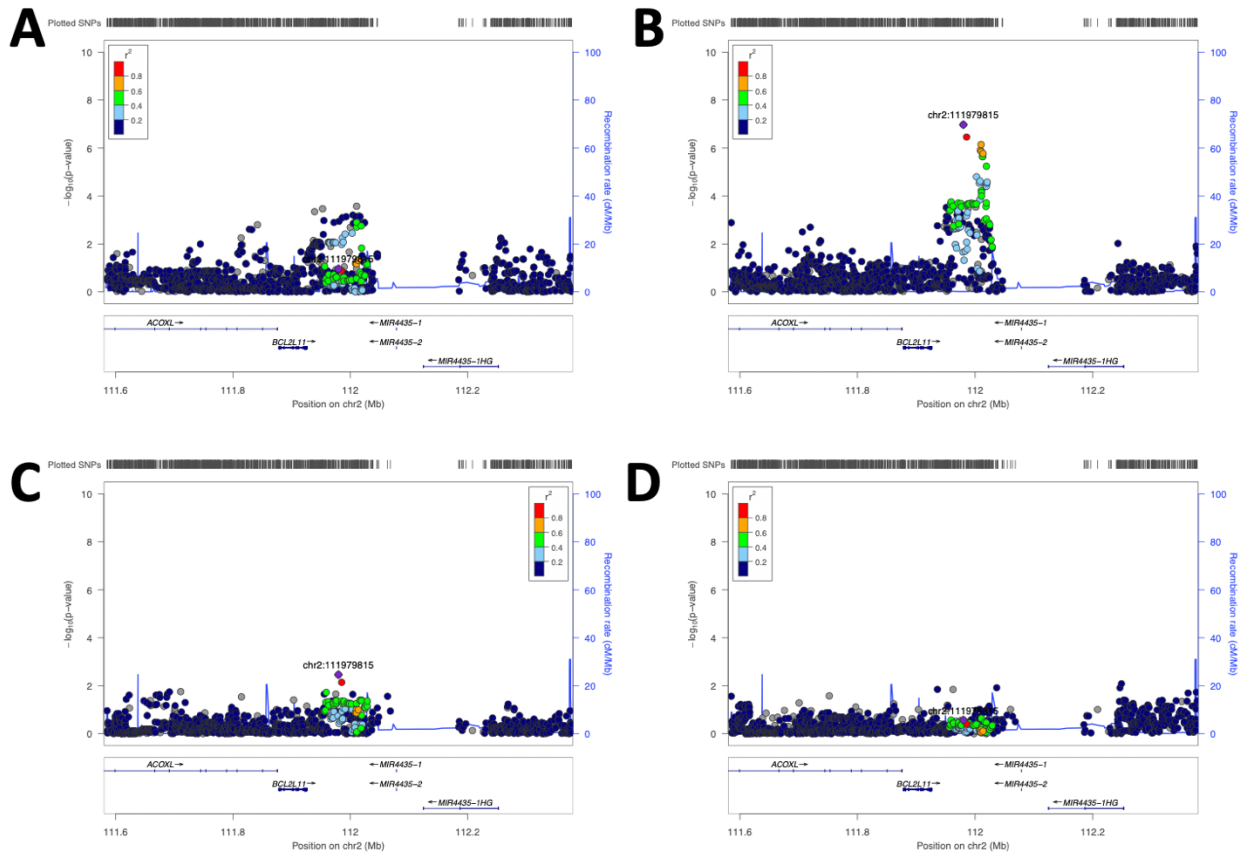

Regional association plots showing  $-\log_{10}(p\text{-values})$  for the novel genome-wide suggestive peaks at 2q13 in the modifier analysis in bilateral CL (A), unilateral CL (B), bilateral CLP (C), and unilateral CLP (D). Plots were generated using LocusZoom. The recombination overlay (blue line, right y-axis) indicates the boundaries of the LD block. Points are color coded according to pairwise LD ( $r^2$ ) with the index SNP.

**Figure S7: Comparison of subtypes across cleft type**

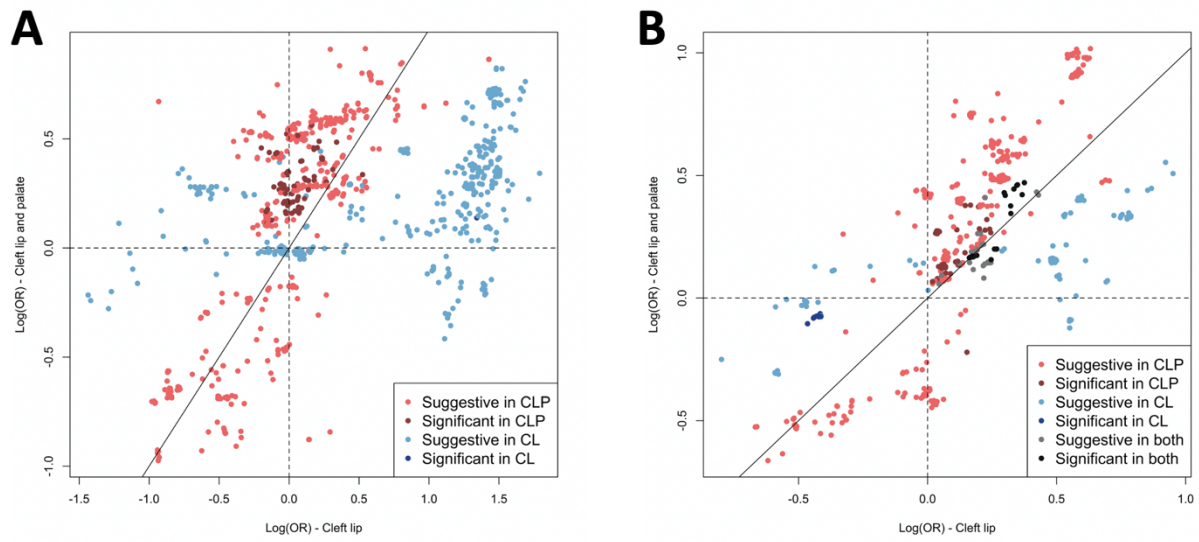

The log odds ratio for SNPs that were suggestive ( $p < 1 \times 10^{-5}$ ) or significant ( $p < 5 \times 10^{-8}$ ) in the subtype-specific case-control analyses in were compared between BCL and BCLP (A), UCL and UCLP (B)

Figure S8: Q-Q plot of modifier analyses

**A**

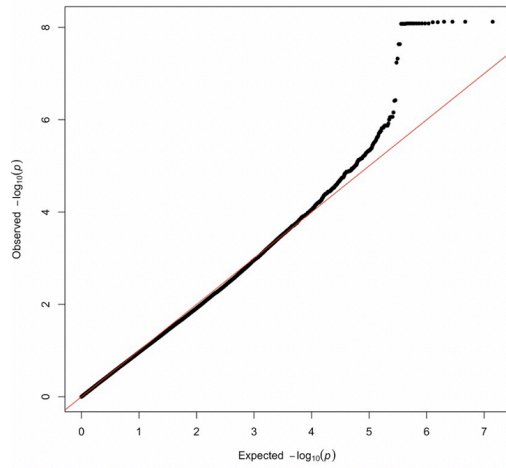

**B**

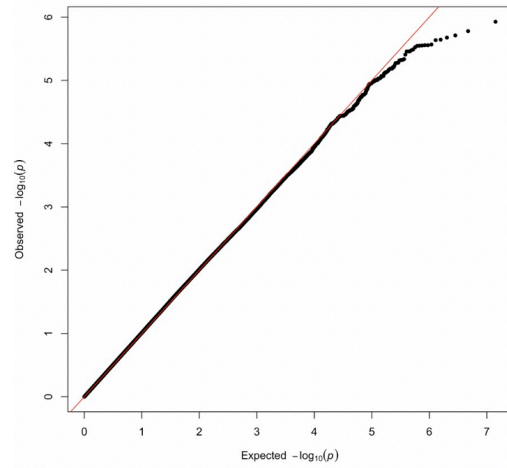

Q-Q plots of the  $-\log_{10}(p\text{-values})$  of SNPs in the CL (A) and CLP (B) modifier analysis. For the analysis in CL, the genomic inflation factor was 0.96; in CLP, the genomic inflation factor was 1.01.

**Figure S9: Analysis of CL/P**

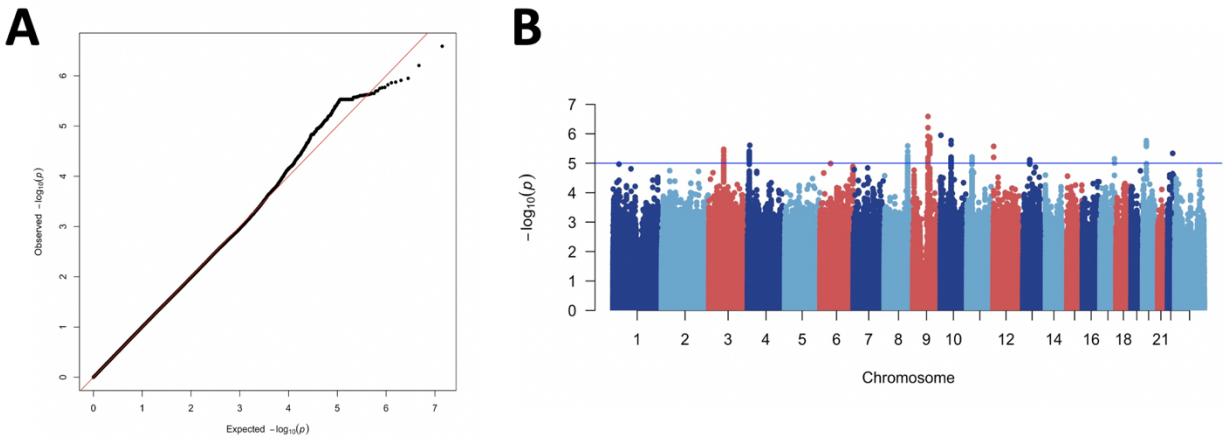

Genome-wide results for the bilateral vs unilateral modifier analysis with CL and CLP combined. Q-Q plots of the  $-\log_{10}(p)$ -values of SNPs in the CL/P analysis (A). The genomic inflation factor is 1.00. Manhattan plots of  $-\log_{10}(p)$ -values from the modifier analysis in participants with cleft lip with or without cleft palate (B). Lines indicate suggestive (blue) and genome-wide (red) thresholds for statistical significance.



**Figure S10: Topologically-associated domain (TAD) of the 20p11 locus.**

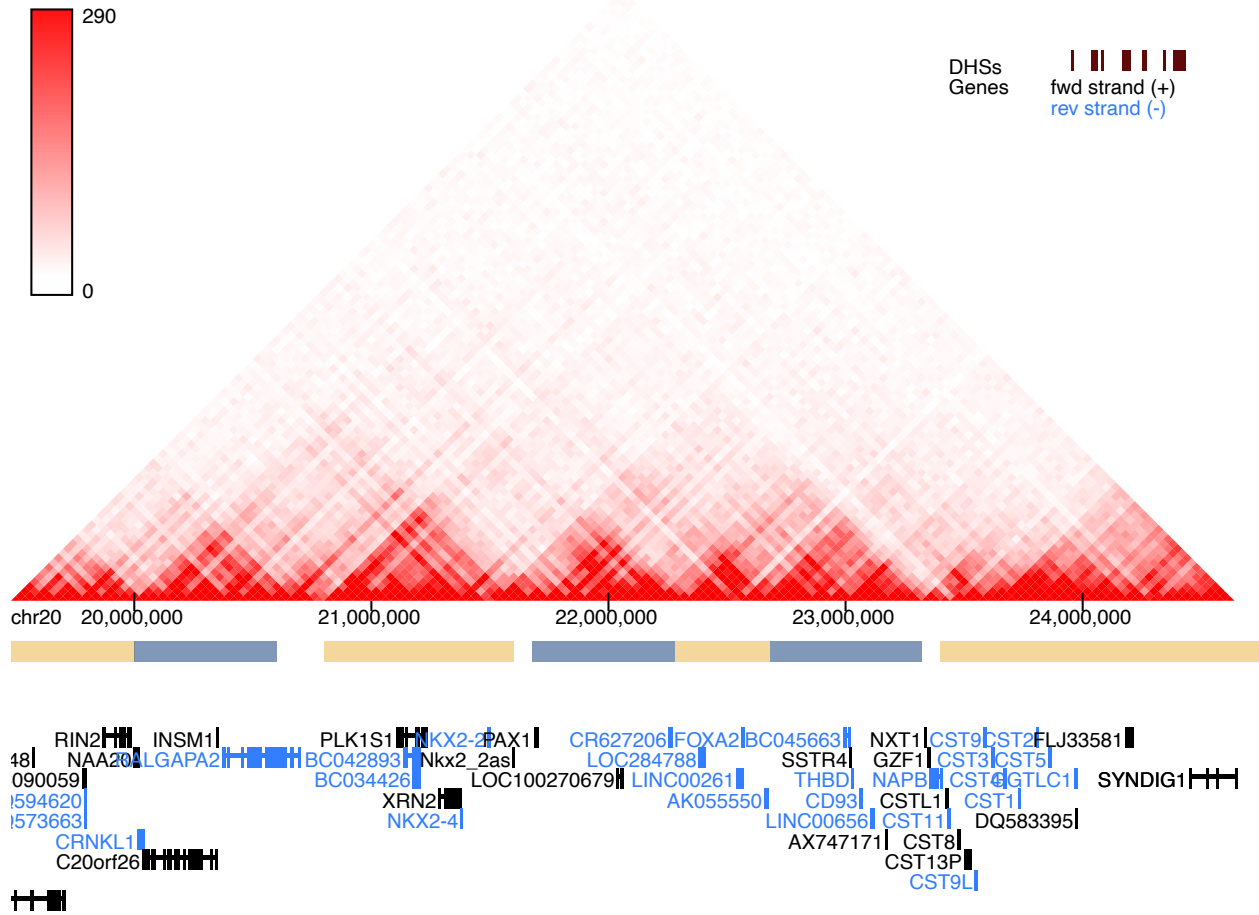

Topologically-associated domain (TAD) surrounding the 20p11 locus that was significantly associated with bilateral CL. The associated SNPs were in the same TAD as *Pax1*.

Figure S11: Functional enrichment

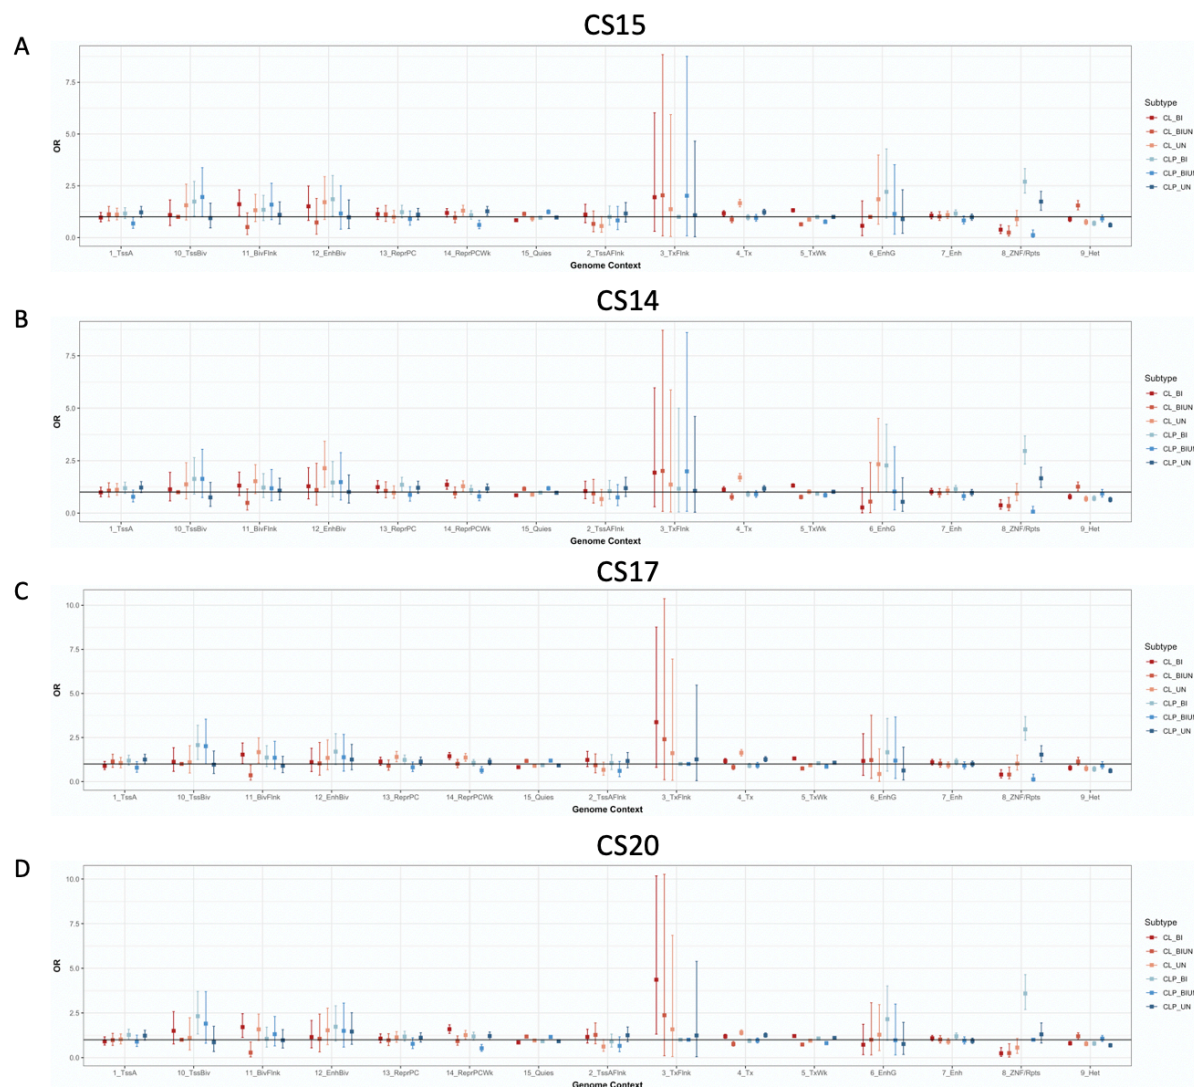

Enrichment of the top SNPs associated in either the CL modifier analysis, CLP modifier analysis, and each subtype analysis ( $p < 1 \times 10^{-3}$ ) were tested in each genomic region defined during craniofacial development.
